# Supplementary material for: Rational design of MXene@TiO2 nanoarray enabling dual lithium polysulfide chemisorption towards high-performance lithium–sulfur batteries
Source: Royal Society of Chemistry journal article supplement (doi:10.1039/d0nr03528a), 2020-01-01
Supplement: d0nr03528a1.pdf [file d0nr03528a1.pdf]

## Supplementary Data

### **Rational design of MXene@TiO<sub>2</sub> nanoarray enabling dual lithium polysulfides chemisorption towards high-performance lithium-sulfur batteries**

**Sheng-You Qiu,<sup>a,1</sup> Chuang Wang,<sup>a,1</sup> Zai-Xing Jiang,<sup>a</sup> Li-Su Zhang,<sup>b</sup> Liang-Liang Gu,<sup>a</sup> Ke-Xin Wang,<sup>a</sup> Jian Gao,<sup>b</sup> Xiao-Dong Zhu<sup>\*a,b</sup> and Gang Wu<sup>\*c</sup>**

- a. School of Chemistry and Chemical Engineering, Harbin Institute of Technology, Harbin, 150001, China. E-mail: zxd9863@163.com.
- b. State Key Laboratory Base of Eco-Chemical Engineering, College of Chemical Engineering, Qingdao University of Science & Technology, Qingdao, 266042, China. E-mail: xiao-dong\_zhu@qust.edu.cn.
- c. Department of Chemical and Biological Engineering, University at Buffalo, The State University of New York, Buffalo, New York 14260, USA. E-mail: gangwu@buffalo.edu.

1. S.-Y. Qiu and C. Wang contributed equally to this work.

**Supplementary Figures and Tables**

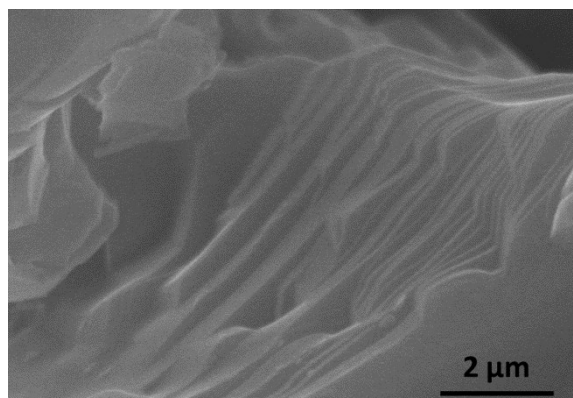

**Fig. S1 SEM image of MAX precursor.**

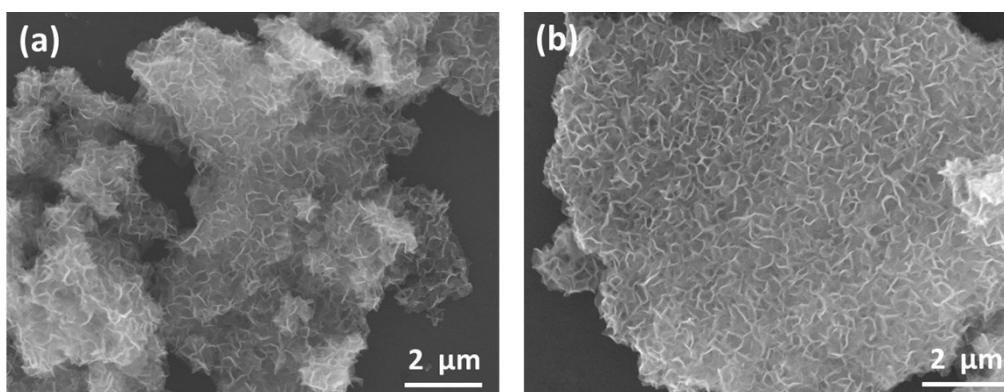

**Fig. S2 Overall SEM images of MXene@TiO<sub>2</sub> nanoarray.**

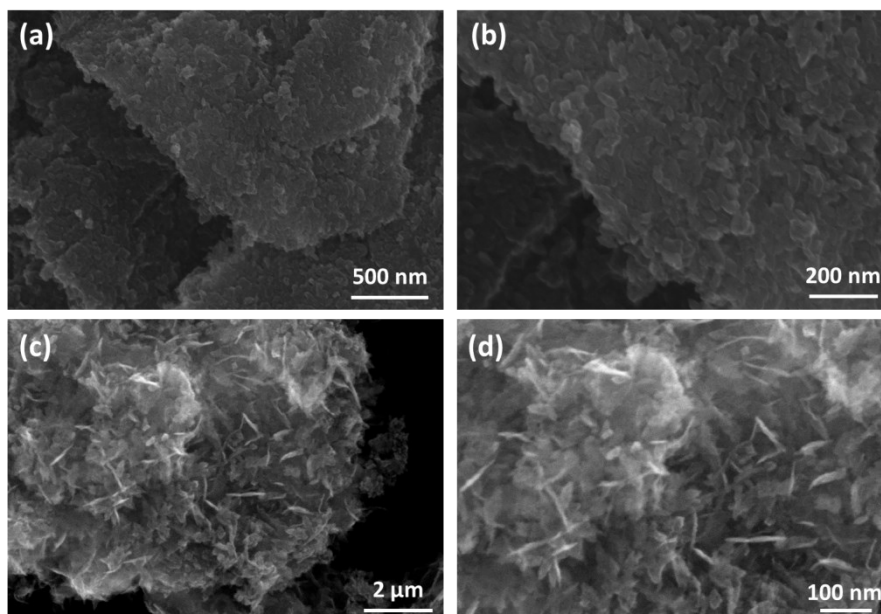

Fig. S3 SEM images of MXene@TiO<sub>2</sub> composites with different inputs of titanium(IV) isopropoxide: (a, b) 0.6 mL; (c, d) 1.4 mL.

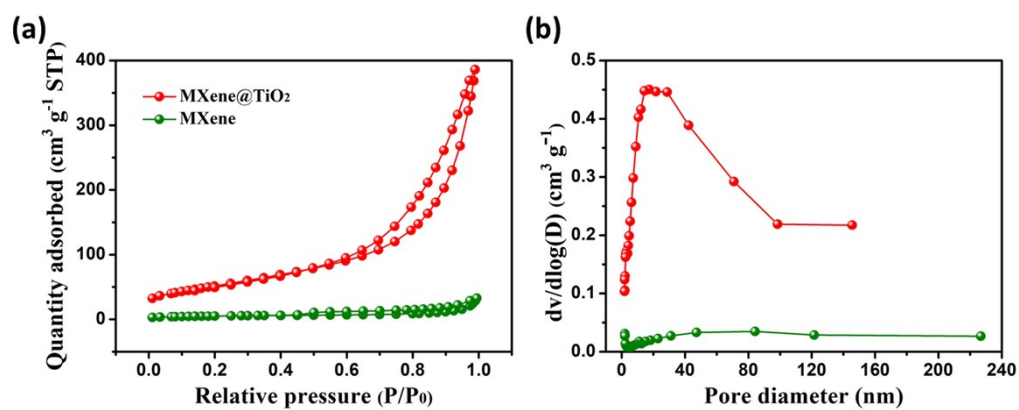

Fig. S4 (a) Nitrogen adsorption-desorption isotherms and (b) pore size distributions of MXene@TiO<sub>2</sub> nanoarray and individual MXene nanosheets.

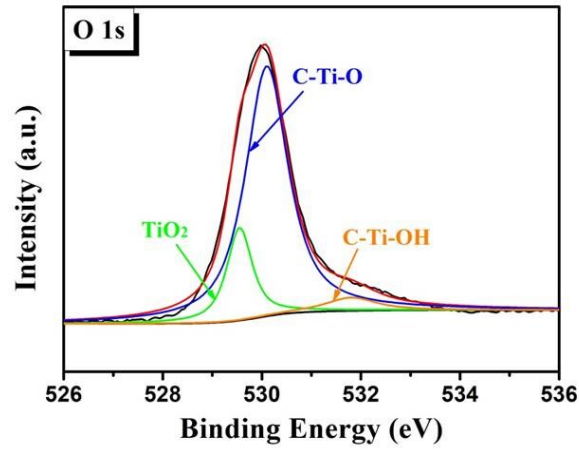

Fig. S5 O 1s XPS spectrum of MXene@TiO<sub>2</sub> nanoarray.

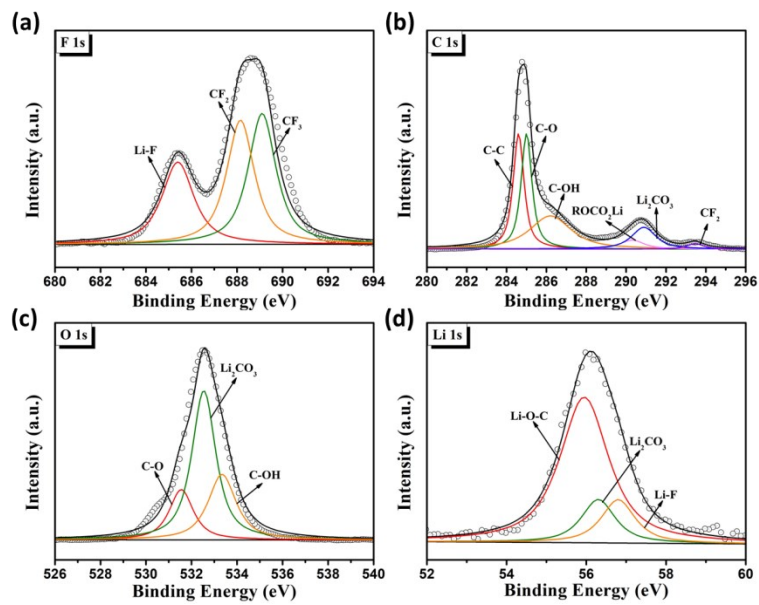

Fig. S6 XPS spectra of MXene@TiO<sub>2</sub>/S cathode surface after cycling: (a) F 1s; (b) C 1s; (c) O 1s; (d) Li 1s.

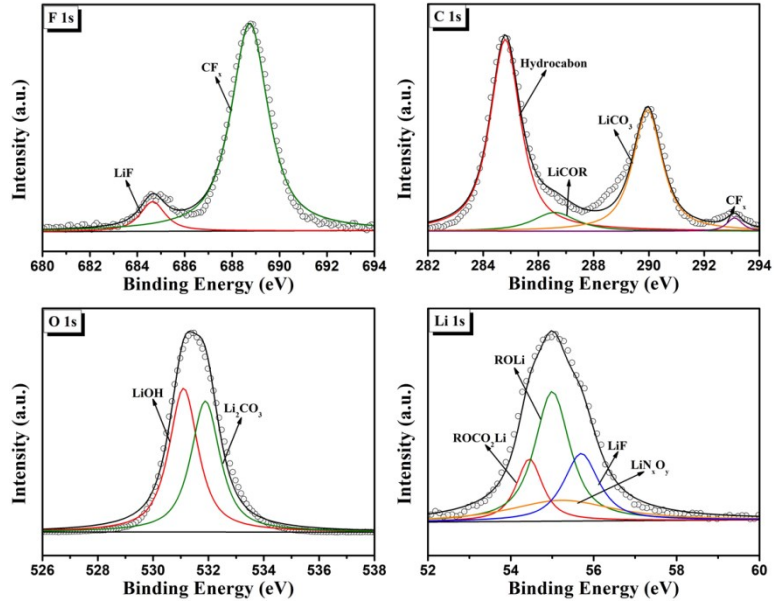

Fig. S7 XPS spectra of Li metal anode surface after cycling: (a) F 1s; (b) C 1s; (c) O 1s; (d) Li 1s.

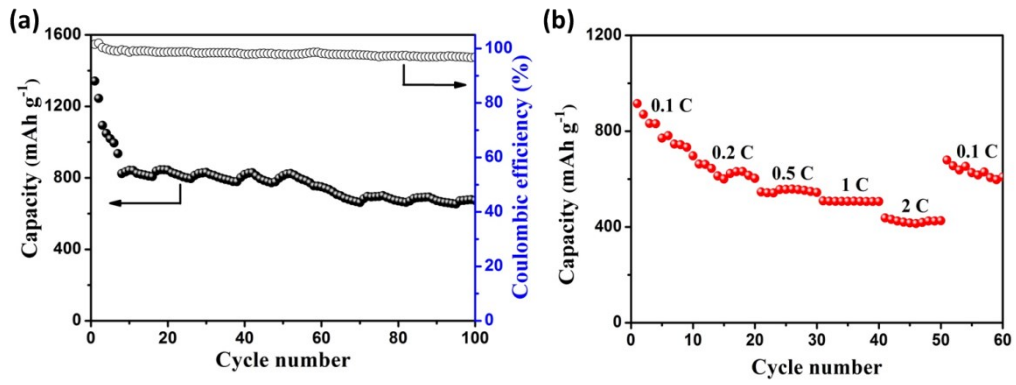

Fig. S8 (a) Cycling at 0.5 C and (b) rate performances of TiO<sub>2</sub>/S cathode.

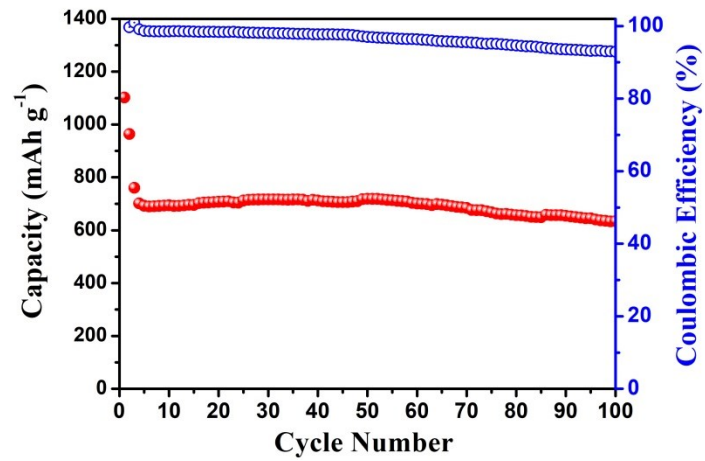

Fig. S9 Cycling behavior at 0.5 C of MXene@TiO<sub>2</sub>/S cathode (sulfur loading=2.5 mg cm<sup>-2</sup>).

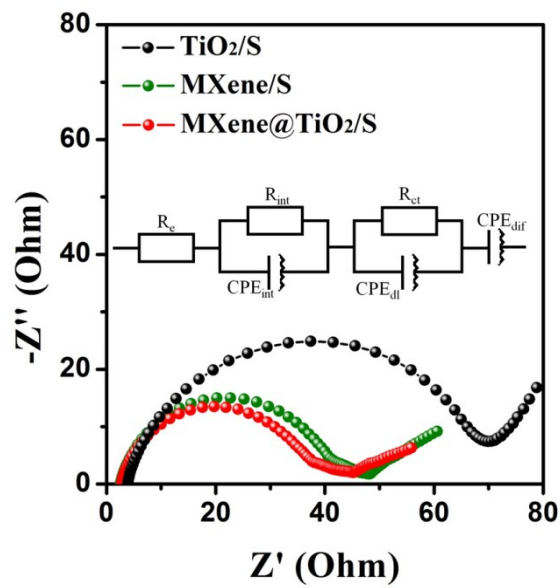

Fig. S10 Nyquist plots of MXene@TiO<sub>2</sub>/S, MXene/S and TiO<sub>2</sub>/S cathodes with the equivalent circuit inset.

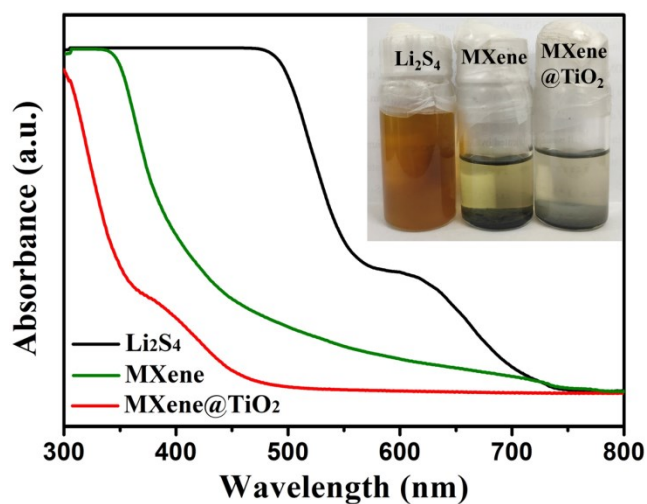

Fig. S11 UV-vis absorption spectra of  $\text{Li}_2\text{S}_4$ , MXene/ $\text{Li}_2\text{S}_4$  and MXene@ $\text{TiO}_2$ / $\text{Li}_2\text{S}_4$  solutions after resting overnight. The digital photo inset shows the consequent color differences.

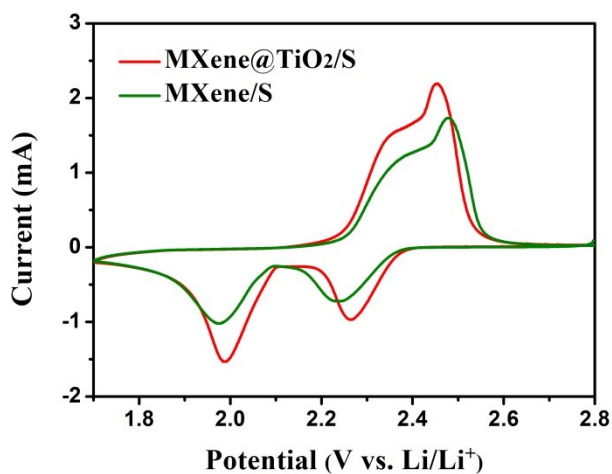

Fig. S12 Comparisons of second-circle CV curves at a scan rate of  $0.2 \text{ mV s}^{-1}$  between MXene@ $\text{TiO}_2$ /S and MXene/S cathodes.

**Table S1. Elemental composition of MXene@TiO<sub>2</sub> nanoarray based on ICP-OES, C element analysis and stoichiometry.**

| Samples | C    | Ti <sub>(sum)</sub> | Ti <sub>(MXene)</sub> | Ti <sub>(TiO<sub>2</sub>)</sub> |
|---------|------|---------------------|-----------------------|---------------------------------|
| Wt%     | 6.24 | 65.13               | 37.30                 | 27.83                           |

**Table S2. Electrochemical performance of Li-S batteries based on TiO<sub>2</sub>- and MXene-based hosts.**

| Host materials                                        | Sulfur (wt%) | Rate (C) | Cycle | Capacity (mAh g <sup>-1</sup> ) | Ref.      |
|-------------------------------------------------------|--------------|----------|-------|---------------------------------|-----------|
| MXene@TiO <sub>2</sub> nanoarray                      | 71.2         | 0.5      | 100   | 1003.9                          | This work |
| MXene@TiO <sub>2</sub> nanoarray                      | 71.2         | 2        | 500   | 612.7                           | This work |
| MC-Meso C-doped TiO <sub>2</sub>                      | 61.04        | 0.1      | 140   | 578                             | 1         |
| M2-GC-TiO <sub>2</sub>                                | 59           | 1        | 600   | 599                             | 2         |
| TiO <sub>2</sub> /Ti <sub>2</sub> C                   | 78.4         | 2        | 200   | 464.0                           | 3         |
| GA/TiO <sub>2</sub>                                   | 75.1         | 1        | 250   | 512                             | 4         |
| G-TiO <sub>2</sub>                                    | 54           | 0.5      | 200   | 853.4                           | 5         |
| Ti <sub>3</sub> C <sub>2</sub> /CNT                   | 79           | 0.5      | 1200  | 450                             | 6         |
| Ti <sub>3</sub> C <sub>2</sub> T <sub>x</sub> /RGO    | 70.4         | 0.5      | 300   | 878.4                           | 7         |
| Ti <sub>2</sub> C                                     | 70           | 0.5      | 650   | 723                             | 8         |
| MXene/1T-2H MoS <sub>2</sub> -C                       | 79.6         | 0.3      | 300   | 799.3                           | 9         |
| N-doped Ti <sub>3</sub> C <sub>2</sub> T <sub>x</sub> | 73.85        | 0.2      | 200   | 950                             | 10        |

**Table S3. Comparison of EIS fitting results for MXene@TiO<sub>2</sub>/S, MXene/S and TiO<sub>2</sub>/S cathodes.**

| Cathode materials         | R <sub>e</sub> (Ω) | R <sub>int</sub> (Ω) | R <sub>ct</sub> (Ω) |
|---------------------------|--------------------|----------------------|---------------------|
| MXene@TiO <sub>2</sub> /S | 2.35               | 7.7                  | 26.8                |
| MXene/S                   | 2.64               | 8.5                  | 33.8                |
| TiO <sub>2</sub> /S       | 3.93               | 32.8                 | 63.9                |



## References

- 1 T. A. Zegeye, C.-F. J. Kuo, A. S. Wotango, C.-J. Pan, H.-M. Chen, A. M. Haregewoin, J.-H. Cheng, W.-N. Su and B.-J. Hwang, *J. Power Source*, 2016, **324**, 239.
- 2 G. D. Park, J. Lee, Y. Piao and Y. C. Kang, *Chem. Eng. J.*, 2018, **335**, 600.
- 3 C. Du, J. Wu, P. Yang, S. Li, J. Xu and K. Song, *Electrochim. Acta*, 2019, **295**, 1067.
- 4 J.-Q. Huang, Z. Wang, Z.-L. Xu, W. G. Chong, X. Qin, X. Wang and J.-K. Kim, *ACS Appl. Mater. Interfaces*, 2016, **8**, 28663.
- 5 H. Fan, Q. Tang, X. Chen, B. Fan, S. Chen and A. Hu, *Chem. Asian J.*, 2016, **11**, 2911.
- 6 X. Liang, Y. Rangom, C. Y. Kwok, Q. Pang and L. F. Nazar, *Adv. Mater.*, 2016, **29**, 1603040.
- 7 W. Bao, X. Xie, J. Xu, X. Guo, J. Song, W. Wu, D. Su and G. Wang, *Chem. Eur J.*, 2017, **23**, 12613.
- 8 X. Liang, A. Garsuch and L. F. Nazar, *Angew. Chem. Int. Ed.*, 2015, **54**, 3907.
- 9 Y. Zhang, Z. Mu, C. Yang, Z. Xu, S. Zhang, X. Zhang, Y. Li, J. Lai, Z. Sun, Y. Yong, Y. Chao, C. Li, X. Ge, W. Yang and S. Guo, *Adv. Funct. Mater.*, 2018, **28**, 1707578.
- 10 W. Bao, L. Liu, C. Wang, S. Choi, D. Wang and G. Wang, *Adv. Energy Mater.*, 2018, **8**, 1702485.
